# Supplementary material for: Application of Oxygen A-band Equivalent Width for Cloud Optical Depth Measurement
Source: Copernicus journal article supplement (doi:10.5194/amt-2016-67), 2016-03-08
Supplement: Supplementary file [file amt-2016-67-AC2-supplement.pdf]

# Application of Oxygen A-band Equivalent Width to Disambiguate Downwelling Radiances for Cloud Optical Depth Measurement

Edward R. Niple<sup>1</sup>, Herman E. Scott<sup>1</sup>, John A. Conant<sup>1</sup>, Stephen H. Jones<sup>1</sup>, Frank J. Iannarilli<sup>1</sup>, and Wellesley E. Pereira<sup>2</sup>

[1]{Aerodyne Research, Inc., Billerica, MA, USA}

[2]{Air Force Research Lab, Albuquerque, NM, USA}

Correspondence to: F. J. Iannarilli (franki@aerodyne.com)

## Abstract

This paper presents the Three Waveband Spectrally-agile Technique (TWST) for measuring Cloud Optical Depth (COD). TWST is a portable field-proven sensor and retrieval method offering a unique combination of fast (1 Hz) cloud-resolving (0.5 ° field of view) real-time-reported COD measurements. It entails ground-based measurement of visible/near-infrared (VNIR) zenith spectral radiances much like the AERONET Cloud-Mode sensors. What is novel in our approach is that we employ absorption in the oxygen A-band as a means of resolving the COD ambiguity inherent in using up-looking spectral radiances. We describe the TWST sensor and algorithm, and assess its merits by comparison to AERONET Cloud-Mode measurements collected during the Department of Energy, Atmospheric Radiation Measurements (ARM), Two Column Aerosol Project (TCAP). Spectral radiance agreement was excellent (better than 1%) while COD agreement was good.

## Keywords

Cloud optical depth, radiative transfer, oxygen A-band, liquid water path, equivalent width

# 1 Introduction

## 1.1 Motivations and contribution

Accurate global climate model (GCM) predictions are absolutely essential. Not only are they needed to help mitigate damage from unwanted climate changes, but also to determine what, if any, interventions can reverse those changes directly. Yet clouds, because of their complexity and inherently random nature, remain a primary challenge to GCM accuracy. Direct optical measurements of cloud optical depth (COD) serve a number of atmospheric and climate change science and monitoring purposes. In fundamental cloud process and observational studies, the column-integrated nature of COD imposes a strong calibration constraint on measurements by vertical-profiling instruments such as LIDAR and cloud radar (Kikuchi et al, (2006)). Localized COD measurements serve as concise validation checks on cloud radiative transfer (RT) models. These purposes are often cost-effectively served by ground-based COD instruments. Global distributed, routine time series observations of COD are similarly useful in GCM validation. Although such observation grids are routinely available from satellite retrievals from short-wavelength reflectances (Nakajima and King, (1990)), there remains substantial added value from ground-based COD instrument networks, such as AERONET (in Cloud Mode). This added value is ascribed to the continuing need for independent validation of satellite-retrieved COD (Liu et al, (2013)), since satellite sensor calibrations degrade in-orbit and suffer their own measurement biases.

A further use that we have made for ground-based COD measurements is providing ground truth for field experiments of optical contrast propagation through clouds. In these applications we have placed emphasis on: (1) fast measurement rate, e.g. 1 Hz; (2) cloud-resolving narrow field of view applicable to scattered clouds as opposed to overcast-only situations; and (3) real-time reporting. As this combination of features was to our knowledge unavailable from existing instruments (circa 2010), we developed the TWST sensor and its COD retrieval algorithm.

COD and cloud droplet effective radius  $r_e$  together are the minimal required parameters to determine a Liquid Water Path (LWP), and thus a connection between cloud macro observables and microphysical parameters. To retrieve COD and  $r_e$  from short-wavelength radiances, a longstanding approach (Nakajima and King, (1990)) has been to employ two wavelengths, one at a non-absorbing (e.g. visible/NIR) and the other at an absorbing

wavelength for liquid water, e.g. longer than 1500 nm. Indeed, the AERONET Cloud Mode has recently adopted a longer-wavelength channel for this purpose (Chiu et al, (2012)), and other ground-based optical sensors employ a sufficiently broad spectral range (McBride et al, (2011), Liu et al, (2013), Fielding et al (2014)). For the TWST sensor's present state of development, we purposely chose not to operate beyond 1100 nm due to cost and complexity burdens we wished to avoid. As the primary data product of TWST is COD, in section 3.2.2 we provide evidence of retrieved COD's relative insensitivity to  $r_e$  for low to moderate COD values.

Our TWST technical approach was inspired by the development of AERONET Cloud Mode, circa 2010 (prior to its employment of the 1640 nm channel), which we summarize next.

## **1.2 Prior art of COD retrieval from zenith spectral radiance**

The use of zenith visible/near-infrared (VNIR) spectral radiances to measure COD advanced with the work of Marshak et al, (2004) using a technique first suggested by Marshak et al, (2000) and Barker and Marshak, (2001). In order to resolve the COD ambiguity, i.e. the lack of a bijective relationship between spectral radiance and COD, they use spectral radiances at red (670 nm) and NIR (870 nm) wavelengths which sit on opposite sides of the chlorophyll red edge feature of the albedo of vegetated terrain. The technique was validated at the ARM Southern Great Plains (SGP) site in Oklahoma by comparison to more conventional techniques (Microwave Radiometer and Multifilter Rotating Shadowband Radiometer). In the work of Chiu et al, (2006) the preliminary validation was extended. In Chiu et al, (2010) the technique was improved by switching to blue (440 nm) and NIR (870 nm) wavelengths. Furthermore, it was applied to selected Aerosol Robotic Network (AERONET) sensors during what otherwise were sun-obscured sleep periods, since becoming known as the AERONET Cloud Mode.

## **1.3 TWST synopsis and paper outline**

The TWST sensor is a zenith staring narrow field of view (NFOV) VNIR spectral radiometer built around an inexpensive commercial compact grating spectrometer (CGS) with a nominal 2.5 nm resolution. The technological sophistication and robustness of the TWST instrument derives almost entirely from its commercial components; we neither depend upon nor make any remarkable claims about sensor design or suitability. In section 2, we describe the TWST

1 sensor and its field-worthiness, present example data, and discuss its calibration, including  
2 dark current correction. In section 4.2.1, within our measurements section, we establish  
3 TWST radiometric veracity and stability by comparison to coincident AERONET spectral  
4 radiance observations over a period of several weeks.

5 Although we customarily record the full spectral record spanning about 350-1000 nm, the  
6 TWST COD retrieval presently makes use of a sparse set of spectral bins composed into 3  
7 spectral factors: the spectral radiances at 440 nm and 870 nm (SR440 and SR870) and the  
8 equivalent width (EQW) of the oxygen A-band centered near 760 nm. TWST is *not* using A-  
9 Band spectrometry to retrieve a numerical COD. Like AERONET Cloud Mode, TWST  
10 employs model-generated look-up tables of spectral radiance to COD. In particular, TWST  
11 tables relate SR440 to COD. TWST differs from Cloud Mode in its resolution of the  
12 aforementioned COD ambiguity. Cloud Mode (circa 2010) employs a 2-dimensional ordinate  
13 space involving the sum and difference of SR440 and SR870, which is bijective to pairing of  
14 COD and effective cloud fraction. TWST instead first determines the cloud optical thickness  
15 regime, Thin or Thick, and thus whether to reference the thin or thick branch of the SR440 to  
16 COD look-up table. The novelty of TWST is its determination of thickness regime from a  
17 multivariate temporal filter employing a color index (the SR440/SR870 ratio) and the slope of  
18 the plot of SR440 versus A-Band EQW. TWST development status presently circumscribes it  
19 to the regime of low-moderate altitude water clouds and small-moderate solar zenith angles  
20 (SZA). Defining TWST's precise operational boundaries is a future task.

21 In section 3.1 we discuss the TWST COD retrieval, including its physical basis, COD error  
22 sensitivity to primary uncertainties, implementation details, and an explanatory example of  
23 the retrieval technique operating on a time sequence of sensor data. In section 4, in addition  
24 to the aforementioned spectral radiance comparison, we establish TWST COD retrieval  
25 accuracy by comparing to coincident AERONET Cloud Mode COD. We present and discuss  
26 the quality of agreement in both an illustrative several-hour time series and the cumulative  
27 correlation over a several week period of the Two Column Aerosol Project (TCAP) field  
28 campaign.

## 2 The TWST sensor

### 2.1 Design and characteristics

The heart of the TWST sensor is a zenith-pointing calibrated spectroradiometer. We elected to design the sensor around a commercial compact grating spectrometer (CGS), given the significant advances in miniaturization, rugged monolithic construction, and linear array detectors. Several advantages accrue from this design choice, the most important to our COD measurement application being the acquisition of spectral radiances at high signal-to-noise-ratio (SNR) and high temporal resolution, attributed to the multiplex advantage provided by the CGS.

The key specifications for the TWST COD sensor are listed in Table 1. Here we are excluding extreme ambient conditions outside the range of -10 C to +40 C that require special temperature control. The spectral resolution defined by the spectrometer configuration is currently ~2.5 nm (including convolution with slit function) and the sampling interval is ~0.3nm. With integral order-sorting filter, the stray light level is cited to be <0.1%. The temporal resolution, determined by the available sunlight, spectrometer throughput, and linear FPA detector characteristics, is a variable sampling interval from 1 msec to 60 sec (1 sec typical). A typical TWST spectrum recorded at 1 sec interval consists of 400 co-added snapshots each of 2.5 msec integration time. The SNR for a single snapshot is limited to 400:1 due to photo-electron noise based on the electron well depth of 160,000. When readout noise is included, this drops to 275:1. With 400 co-adds, the 1 second maximum-signal SNR is therefore about 5,500:1.

We have now built and tested a few different configurations of the TWST sensor, but each includes the basic elements represented in the schematic design in Figure 1; a companion photograph looking inside a recent model is shown in Figure 2. The entrance window (A) is slanted to shed rain drops. A simple mechanical shutter (S) for recording dark spectra, selected for its reliability and effective light blocking performance, is located just inside the input window and driven by an inexpensive stepping motor. An incoming light baffle (B) limits the total field-of-view to 0.5 ° FWHM. A collecting lens (C) then focuses the filtered light onto the end of a 400 µm dia. optical fiber (D) which feeds the light into the CGS (E). The entire system is contained in an IP66 (NEMA 4X) rated sealed enclosure with desiccant to prevent water condensation over deployment periods of several months. Our design has

1 proven to be field-worthy, easily transportable, and stable over a wide range of environmental  
2 conditions as supported in section 4.2.1. We have experienced no instances of condensation  
3 inside the sealed TWST enclosure while operating in humidity and temperature conditions  
4 well below the dew point.

## 5 **2.2 Example spectral data**

6 The TWST retrieval algorithm uses three spectral factors (Figure 3): the spectral radiances at  
7 440 nm and 870 nm (SR440 and SR870) and the equivalent width (EQW) of the oxygen A-  
8 band (section 3.3.1). Figure 3 shows example calibrated spectral measurements for nearly  
9 identical SZA, but for clear sky and a range of COD values in the Thin optical thickness  
10 regime. The overall radiance level as well as the depth of the oxygen A-band absorption are  
11 observed to increase with COD.

## 12 **2.3 Calibration and dark current correction**

13 There are two forms of calibration that must be managed for any technique that uses spectro-  
14 radiometers: wavelength and radiometric. The wavelength calibration of the compact grating  
15 spectrometers used in our TWST sensors has proven stable over periods of months.  
16 Furthermore, the TWST approach does not rely on resolving spectral line structure. The 440  
17 nm and 870 nm spectral radiance levels, due to their shallow spectral slopes (Figure 3), and  
18 A-Band EQW value, due to its accumulation over many spectral bins, are relatively  
19 insensitive to foreseeable thermal shifting of the spectral sampling grid.

20 TWST spectral radiance calibration is performed at the beginning and end of every field  
21 deployment and more frequently as needed. Our calibration source is a Labsphere Uniform  
22 Radiance Standard integrating sphere. It is well-known that the standard incandescent source  
23 lamps age and need to be replaced periodically. Like other long time users, we find these  
24 lamps to be the largest source of uncertainty and absolute error in our radiometric calibration  
25 procedure; that uncertainty is ~5%. During each calibration we set the integration period,  
26 number of snapshot coadds, and aperture radiance to span the range of field conditions  
27 anticipated for sunlit clouds, and then we derive a linear photoresponsivity coefficient in the  
28 usual manner. These radiometric calibration records for each TWST unit are kept and  
29 compared over periods of years to monitor the stability of each unit for its lifetime. Having

records for some units over 2-4 years, we find changes in the calibration of 1-3%, well within the uncertainty of our calibration lamps which as noted above is on the order of 5%.

The spectrometer's silicon CCD detector outputs are susceptible to offset drift, typically driven by changes in ambient temperature, but the detector array contains light-shielded dark-reference detectors intended to automatically track and subtract such drift. In addition, TWST employs a mechanical shutter for frequent collection of dark spectra, typically a 1-second dark spectrum every 60 seconds. The dark correction (offset subtraction) applied to each recorded spectrum is spline-extrapolated from earlier collected dark spectra. In section 4.2.1, the effectiveness of these calibration methods is evaluated by comparison to coincident AERONET spectral radiance observations over a period of several weeks.

### **3 TWST cloud optical depth retrieval method**

#### **3.1 Section outline**

The TWST retrieval algorithm employs model-generated look-up tables to convert zenith spectral radiance at 440 nm (SR440) to a numerical value of COD. However, the TWST algorithm first determines the cloud optical thickness regime, Thin or Thick, and thus whether to reference the thin or thick branch of the SR440 to COD look-up table. We first discuss the somewhat conventional spectral radiance to numerical COD lookup, including table generation, COD error sensitivity to principal uncertainties via radiative transfer simulations, and technique of interpolation between table entries. Then we discuss the determination of the optical thickness regime. This entails discussion of why the Oxygen A-band and its equivalent width (EQW) metric are informative of the thickness regime. We introduce the “nose” plot of SR440 vs EQW, and its *generic* slope characteristics are revealed as a key to resolving the thin/thick ambiguity; the algorithm does not use *model-generated* nose plots. We explain the need and basis for the SR440/SR870 ratio as color index. The color index and nose plot slope metrics are combined in a multivariate temporal filter that continually updates the estimate of optical thickness regime. To illustrate its operation, and how it copes with 3D cloud effects, we discuss an example nose plot time sequence and filtered results.

## 3.2 Numerical spectral radiance to COD lookup

### 3.2.1 Radiative transfer construct

Assuming the sensor's field of view (FOV) does not include the sun, the zenith spectral radiance consists of solar radiation scattered by the molecules, aerosols, and cloud water droplets in the FOV, which may include radiation that has been scattered multiple times from the atmosphere and the terrain. The visible/NIR spectral band (Figure 3), at a moderate spectral resolution of 2 nm, shows a broad baseline with multiple narrow absorption features. Many of these are due to water vapor, as well as Fraunhofer lines. The spectral radiance at 440 nm is in a region relatively free from atmospheric gaseous absorption, and thus suitable as a COD proxy. We chose 440 nm for TWST radiance-to-COD look-up because that is a wavelength used by AERONET Cloud-Mode sensors, which serve as a source for comparative validation.

The model used for generating 440 nm radiance-to-COD look-up tables is the MODTRAN5 atmospheric radiative transfer code (Berk et al., 2006). MODTRAN incorporates the DISORT code (Stamnes et al, 1988) for plane-parallel stratified media, i.e., idealized 1-dimensional radiative transfer (1DRT). Calculations are done for a *typical* water stratus cloud above a stated ground albedo, for a stated nominal aerosol profile, over a grid of COD and solar zenith angles (SZA). Figure 4 is a graphical depiction of sample tables. For any SZA, there is a "bright point" radiance where the idealized 1DRT cloud radiance reaches a maximum, typically occurring for a COD between 2 and 8, as seen in Figure 4. Real clouds manifest 3-dimensional radiative transfer (3DRT) effects, including radiances exceeding the idealized 1DRT bright point radiances (Marshak et al, (2000)). When faced with such exceedances, the TWST retrieval algorithm reports the COD corresponding to the bright point radiance but flags an out-of-bounds ("3D Cloud") condition.

### 3.2.2 COD error sensitivity to radiative transfer parameter uncertainties

The TWST algorithm currently operates without any information on the droplet size distribution or the cloud base height, and with a prior estimate of the ground albedo and aerosol loading profile. We do not consider deviation of the actual from nominal aerosol profile, as such perturbation from the baseline aerosol optical depth (AOD) is typically a small contributor to reported COD. We performed some initial sensitivity studies on these remaining parameters. The albedo sensitivity findings below will prove of value in helping to



1 explain the minor disagreement bias between coincident TWST and AERONET COD  
2 observations (section 4.2.2).

3 Because our implementation of the TWST algorithm uses a radiance database generated with  
4 the MODTRAN model, we studied 440 nm radiances from four different cloud types  
5 parameterized within MODTRAN, which assume Mie scattering, log-normal droplet size  
6 distribution, and liquid water refractive index. These types have effective radii of 12.0  
7 (cumulus), 7.2 (altostratus), 8.3 (stratus), and 6.7 (stratocumulus)  $\mu\text{m}$ . Water cloud drop-size  
8 distributions typically vary from an effective radius of 1 – 20  $\mu\text{m}$  (see e.g. Chiu et al, (2006)).  
9 We modeled clouds with fixed base height of 0.5 km and fixed physical thickness of 0.5 km.  
10 For each cloud type we varied the Liquid Water Path (LWP) enough to achieve 550 nm CODs  
11 between 0 and 100; LWP was used because it is an input to MODTRAN. COD values were  
12 estimated from LWP using the Wood and Hartmann, (2006) modification to the Stephens,  
13 (1978) formula as described in Chiu et al, (2012). Figure 5 shows the computed 440 nm  
14 vertical radiances plotted versus LWP and COD. The different size distributions lead to  
15 different radiances for the same LWP as expected. However, in the COD vs. radiance plot the  
16 curves overlay closely, at least for  $\text{COD} \leq 20$ . We verified this intuitive result using a simple  
17 standalone two-stream computation as an alternative to the DISORT algorithm included  
18 within MODTRAN (Stamnes et al, (1988)). These results are corroborated by the more  
19 extensive sensitivity results of McBride et al (2011). This relative insensitivity of COD with  
20 effective radius gives us some confidence in reporting COD values in face of the variety of  
21 water clouds.

22 Inter-reflections between the ground and a thick cloud can be significant unless the Earth  
23 albedo is low. At the 440 nm look-up table wavelength most Earth cover types have albedo of  
24 0.2 or less as shown in Figure 6 with samples of the ASTER Database (Baldrige et al,  
25 (2009)); notable exceptions are for white sand, fresh snow, and ocean ice. To characterize the  
26 sensitivity of retrieved COD due to albedo uncertainty, we used MODTRAN to compute 440  
27 nm zenith radiances for a low-altitude stratus cloud for albedos of 0.0, 0.1, 0.2 and 0.5, over a  
28 range of solar zeniths and cloud optical thicknesses. Figure 7 presents a first-order indication  
29 of sensitivity, and plots 440 nm radiances versus COD for albedo bounds of 0.0 and 0.5. The  
30 thin/thick ambiguity, the strong variation with solar zenith, and the weaker variation with  
31 ground albedo are evident in these plotted results.

1 The plot in Figure 8(a) further explores this sensitivity, and shows the signed change in  
2 retrieved COD value for an unexpected increase in the ground albedo from 0.1 (for which the  
3 radiance-to-COD lookup tables are computed) to 0.2. Each curve, for either thick or thin  
4 cloud, pertains to some fixed percentage of the aforementioned 1DRT bright point radiance  
5 “Lbrt” (which varies with SZA, *cf.* Figure 4). These curves show that a higher than expected  
6 albedo implies retrieval of a lower (higher) COD in the Thick (Thin) regime. The largest  
7 change we found was  $\Delta\text{COD}$  of 5, but that occurred for very thick clouds, such that the  
8 relative change was only 10%. Near the bright point (red curves in Figure 8(a)) the COD vs  
9 radiance is quite non-linear (Figure 4), and thus the red curves, approximated by linear  
10 interpolations for this study, are less-precise, and jagged.

11 To provide analytic support to these albedo sensitivity findings, we performed calculations  
12 employing asymptotic radiative transfer (ART) theory relations as elucidated by King, (1987)  
13 and Melnikova et al, (2000). Both MODTRAN and our ART calculations compute the 440  
14 nm radiance and optical thickness for cloud with phase function asymmetry parameter  $g=0.86$   
15 and single scattering albedo  $\omega_0>0.9999997$  (i.e. conservative scattering). ART-computed  
16 sensitivities are plotted in Figure 8(b), and compare well in both trend and magnitude against  
17 the Thick regime curves of Figure 8(a), to which ART theory pertains (here  $\text{COD}>9$ ). These  
18 ART sensitivities are processed from the more directly obtained ART calculations plotted in  
19 Figure 9. The connection between Figure 9 and Figure 8(b) is depicted by the dotted path  
20 shown in Figure 9. The reader is directed to graphically determine the error in retrieved COD  
21 value by first starting with a given true COD value, tracing rightward from that y-intercept  
22 parallel to the x-axis and reaching a curve pair for a given SZA. The right curve of the pair  
23 registers the actual radiance measured for the unexpected 0.2 albedo, but the left curve is  
24 radiance-to-COD lookup table computed for the expected 0.1 albedo. So at intersection with  
25 right curve, the reader traces *down* parallel to the y-axis to intercept the left curve, then traces  
26 leftward back to the y-axis and reads out the lower COD value. The solid curves of Figure  
27 8(b) are not exactly comparable to those of Figure 8(a), in that the former are for constant-  
28 COD whereas the latter are for constant relative radiance (with respect to the 1DRT bright  
29 point radiance). To corroborate that the COD error in fact decreases with SZA, the dashed  
30 curves of Figure 8(b) better (but not exactly) correspond to constant relative radiance. These  
31 dashed curves have COD decrease with decreasing SZA, which referring to Figure 4 yields a  
32 more stationary relative brightness (downward-sloping line marker) than for COD constant  
33 with SZA (horizontal line marker).

At this point it is important to note that the spectral radiance chosen at some other wavelength than 440 nm could be used for the radiance-to-COD look-up. In principle the choice of wavelength depends upon freedom from atmospheric gaseous absorption and on the ground albedo of the measurement site. One wants a wavelength with the lowest absolute albedo uncertainty to minimize errors in the COD due to errors in the assumed albedo for the MODTRAN5 computations. This flexibility in the choice of wavelength is basis of the term “Spectrally-agile” within the TWST acronym.

For low-altitude water clouds, uncertainty in the cloud base height has a negligible impact on COD retrieval. We ran MODTRAN for cloud base heights of 500 m and 2 km, iterating over 10 COD and 11 solar zenith angles for each. The 440 nm radiances were nearly identical, as shown in the scatter plot of Figure 10.

### 3.2.3 Lookup table interpolation

Various table lookup algorithms were investigated to reach a reasonable tradeoff between accuracy and speed. The MODTRAN5 tables are preprocessed as follows. Referring to Figure 4, for each  $SZA_i$  entry, a cubic spline curve  $SR440(COD;SZA_i)$  is fit to its  $SR440$ -vs-COD table for both optical thickness regimes. A bright point radiance vs  $SZA$  spline curve  $Lbrt(SZA)$ , depicted by the dotted black curve in Figure 4, is fit through the bright point radiances across the  $SZA_i$  entries. During operation, the algorithm identifies the tabulated  $SZA_j$  closest to the current solar zenith angle  $SZA_{obs}$ . Then a working copy of its spline curve  $SR440(COD;SZA_j)$  is linearly scaled in radiance so that its bright point matches  $Lbrt(SZA_{obs})$ . This scaled curve is then used to look up the COD value for the measured  $SR440$ .

## 3.3 Optical thickness regime determination

### 3.3.1 Cue from Oxygen A-band equivalent width (EQW)

The well-known Oxygen A-band centered near 760 nm (Mulliken, (1928), Wark and Mercer, (1965)) has been used for many years to study the atmosphere from satellite and ground-based sensors. Pfeilsticker et al, (1998) first used well-resolved A-band spectra to study the probability density function of geometrical path lengths for skylight transmitted from clear and cloudy skies to the ground, following the suggestion of Pfeilsticker et al, (1996) and Harrison and Min, (1997). The A-band is virtually free from absorption by other atmospheric constituents (Pfeilsticker et al, (1998)) except for aerosol and cloud continua extinction plus a

very small amount of line absorption by water vapor (Figure 11). Thus its continuum-normalized (section 3.3.2) spectral-average quantity, termed the Equivalent Width (EQW), provides a direct measurement of the average amount of oxygen-density-weighted photon path length from the sun to the sensor. Since oxygen is uniformly mixed in the atmosphere, this is related to the photons' physical path lengths. Therefore the EQW supplies useful information about whether a zenith radiance measurement is in the optically-thin or optically-thick regime. A virtue of EQW is that it may be stably computed from low-resolution spectral data such as from the TWST sensor, as detailed in section 3.3.2.

Of course, other factors cause EQW to change besides COD. Changes in the SZA produce decreases in EQW with time during the morning and increases in the afternoon. Changes in the density-weighted average cloud thickness and cloud altitude also affect the EQW independent of the COD.

### 3.3.2 Calculation of EQW

The equivalent width is computed from the spectral radiances between 750 to 785 nm by fitting a straight line to the continuum baseline from 750 - 760 nm and 770 - 785 nm (Figure 11), then dividing each measured spectral radiance by the corresponding linear fit baseline to produce a transmittance value, and then summing these values across the absorption band. This calculation normalizes away the continuum transmittance. The veracity of these calculations depends on accurate spectrometer dark current calibration and subtraction (discussed in section 2.3). Otherwise, a dark bias of the spectral radiance would falsely alter the computed transmittances and EQW value.

### 3.3.3 "Nose" plot of SR440 vs EQW

COD is a two-valued function of up-looking spectral radiance while oxygen equivalent width is a monotonic function of COD for  $COD \gg 1$ . By plotting SR440 versus EQW as COD increases from no cloud to thick clouds one traces out a "nose-like" shape (Figure 12). For the very lowest COD values, EQW decreases with increasing COD and the slope is negative. Beyond about  $COD=1$ , the lower portion of the "nose" where the slope is positive corresponds to the optically thin regime; the upper portion where the slope is negative corresponds to the optically thick regime. Within a span of several seconds, passing clouds most often do not trace out a complete nose but only a small segment of it as the cloud evolves and drifts in the wind over the sensor. Notwithstanding the lowest COD values discussed further below,

1 whether the cloud changes involve increases or decreases of the COD, the slope of the  
2 corresponding segment indicates the cloud's optical thickness regime. This is the TWST basis  
3 for resolving the COD ambiguity.

4 The nose plot in Figure 12 includes a smooth curve, based on MODTRAN5 computations but  
5 elastically stretched to fit the depicted data points over a 4 minute measurement where the  
6 COD varied strongly between the indicated blue sky, thin and thick regimes, as well as points  
7 deviating well away from the ideal 1DRT smooth curve. These deviating points are classified  
8 as either "3D Cloud" based on their SR440 exceedance of the 1DRT bright point radiance  
9 value (section 3.2.1) or as "Mixed" points attributed to heterogeneous cloud structure within  
10 the field of view, itself a 3DRT effect. The classification of the remaining data points into  
11 optically thin, thick or blue sky regimes was corroborated against coincident all sky camera  
12 video. Although the MODTRAN5 computed nose plot curve supports these regime  
13 classifications, it is important to note that the TWST algorithm does not employ model-  
14 generated nose plot curves to guide its thickness regime determination. Indeed, the particular  
15 shape and slope of a computed nose plot curve varies, as it should, with the unknown physical  
16 cloud thickness. Instead, the algorithm exploits the aforementioned positive-slope:Thin,  
17 negative-slope:Thick generic properties of the nose plot.

#### 18 3.3.4 Thickness regime filter

19 The cloud optical thickness regime determination operates in two distinct radiance domains.  
20 When the COD is very low, e.g.  $COD \leq 1$ , the amount of radiation in the NIR is very small  
21 and the signal to noise ratio (SNR) of the EQW is low (e.g. "clear sky" in Figure 3) and thus  
22 the nose plot slope SNR is too low to resolve the thickness regime. The ratio of SR440 to  
23 SR870, termed the color index, has a much higher SNR and is more reliable in this regime.  
24 This, of course, is a simple consequence of the wavelength dependence of Rayleigh  
25 scattering. For low-moderate altitude water clouds, small-moderate SZA, and typical 440 nm  
26 ground albedos less than 0.2 (Figure 6), our data analyses have found a hard threshold of 4 to  
27 be a sure indicator of optically very thin clouds (e.g. "clear sky" in Figure 3) and a soft  
28 threshold of  $2 < index < 4$  to be a strong indicator (e.g. " $COD < 1$ " in Figure 3). When the color  
29 index is less than 2, the cloud's optical thickness is not well correlated with the index, and the  
30 algorithm must rely on the nose plot slope.

Figure 13 re-depicts the nose plot data points of Figure 12, this time connecting a subset of points with line segments to indicate adjacent samples in a 2-minute time series. If measured nose plots followed an idealized 1DRT curve as indicated in Figure 12, the determination of thickness regime would be nearly trivial. A linear regression over a short time segment would suffice. Clearly more complex logic is required, yet it is visually evident that local coherence could be exploited. The qualitative reduction in ambiguity afforded by examining a sufficient time record suggests the use of a filter with memory. For example, for passing or evolving clouds spatially well-resolved within a narrow field of view, the thickness regime should not switch rapidly between thick and thin except possibly near the bright point (thick/thin regime boundary) where a switch is inconsequential to the retrieved COD. We implemented a time varying hysteresis filter to effectively avoid this unwanted switching. The hysteresis action is achieved by keeping track of the maximum and minimum values of equivalent width over a predetermined time interval, typically about three minutes. In order to drive the filter toward a different thickness regime, the hysteresis limits must be exceeded. The output of the hysteresis filter is discrete ternary: -1, 0 or 1, corresponding to thick, indeterminate or thin. Finally, this ternary variable is input to a linear, single pole autoregressive (AR(1)) filter to afford additional smoothing. The output of this filter is thresholded and used as the thickness regime estimate.

### 3.3.5 Example operation of thickness regime filter

Figure 13 includes time series plots of SR440 and algorithm retrieved COD corresponding to the connected data points in the nose plot. The dark- and medium- blue points indicate thick- and thin-cloud, while light cyan points indicate clear sky. Yellow points are for SR440 values greater than the 1DRT bright point value and are indicative of 3D cloud effects. The green aforementioned Mixed points (section 3.3.3) were determined manually, and are those where the values deviated strongly from the overall nose curve locus; red line segments serve to indicate where along the time series those deviations start and end. Using an instrument with small field-of-view and fast time-response we expect to see good temporal coherence in the data, and in fact the radiance time plot shows that the cloud optical thickness regime does not change randomly. One can see that the green-labeled points are always transitions between thin and thick cloud which didn't follow the idealized nose curve through the bright point (at a radiance of about 23). The EQW values of those points are reasonable, but the radiances are lower than expected. Our supposition at this time is that some of these are due to further 3D

cloud structure effects, but leading to darker radiances rather than the bright radiances of the yellow points, while others points may be due to spatial averaging over the field-of-view.

## **4 Measurements and comparisons to AERONET**

### **4.1 The Two Column Aerosol Project (TCAP)**

TCAP was a one year measurement campaign directed by the Atmospheric Radiation Measurements (ARM) division of the U.S. Department of Energy. It was designed to quantify aerosol properties, radiation, and cloud characteristics, producing a database to assist climate modeling studies. The ground-based campaign involved the ARM Mobile Facility (AMF) suite of sensors deployed at the ARM Highlands in Cape Cod Massachusetts. The aerial campaign involved two aircraft loaded with remote and in situ sensors. Measurements were performed from July 2012 until June 2013.

With the kind permission and assistance of the TCAP project, the TWST sensor was set up on Cape Cod near the AERONET Cloud-Mode sensor and Total Sky Imager (TSI) which are part of AMF on 17 May 2013. Data were collected continuously for a period six days. Some minor adjustments were then made to the sensor configuration, and then data were collected for the next thirty days until 27 June when the AMF was taken down in preparation for its next deployment. During this period about 50,000 spectra were collected by TWST every day at one second intervals during the day.

### **4.2 AERONET Cloud-Mode and TWST data comparison**

During the time TWST was deployed on Cape Cod, AERONET collected 266 COD values that overlapped TWST measurements. In addition, 8,609 overlapping spectral radiance values at 440 nm were collected. Since all TWST's COD values were based on SR440 measurements, it is important to compare the SR440 values before comparing the COD values.

#### **4.2.1 Spectral radiance comparison**

This required careful time synchronization between the AERONET and TWST data times. A linear drift of 0.27 seconds/day was determined by least squares fits to the individual days with a 4 second difference between the high gain (x8) A and low gain (x1) K measurements from AERONET. The result (Figure 14) shows that both sensors were reporting SR440 values

1 in very good agreement. The rms difference was  $0.63 (\mu\text{W cm}^{-2} \text{ sr}^{-1} \text{ nm}^{-1})$ . A simple linear fit  
2 without constant yielded a slope of 1.003 (0.0004). TWST values at high spectral radiance  
3 showed some evidence of nonlinear response.

4 Several conclusions follow from the very good agreement among TWST and AERONET  
5 spectral radiances. The first is the expectation of a COD comparison not influenced by TWST  
6 spectral radiance errors. As a corollary, the COD comparison should not be unduly influenced  
7 by different fields of view ( $1.2^\circ$  for AERONET versus  $0.5^\circ$  for TWST) and zenith pointing  
8 (robotic control for AERONET versus fixed tripod with bubble level for TWST), given the  
9 close agreement over many different cloud conditions. The sensors were laterally displaced  
10 by about 3 m, and for a 1 km cloud base altitude their field of view footprints are 20 m and 8  
11 m. Of course, the agreement only proves consistency, not accuracy for either sensor. The  
12 second is the radiometric stability of TWST during its TCAP deployment. This is  
13 corroborated by the stability of the 4 pre- and 1 post-test radiometric calibrations, with the  
14 photoresponsivity coefficient at 440 nm for 9 July being 98.1% of that for 17 May.

#### 15 4.2.2 COD comparison

16 A comparison of COD values between TWST and AERONET Cloud-Mode must recognize  
17 the time-sampling differences between them. For these comparisons only the 90 second  
18 average COD was available for AERONET Cloud-Mode, which is a form of trimmed mean  
19 based on up to ten instantaneous COD measurements during each measurement period (see  
20 Chiu et al, (2010) [sec.2.3]).

21 A time series comparison of COD is shown in Figure 15. The agreement indicates that the  
22 TWST thickness regime filter is able to track the rapidly changing COD. The ensemble  
23 comparison of the COD values (Figure 16) shows evidence of the two different types of errors  
24 in the TWST and AERONET Cloud-Mode algorithms: errors in cloud thickness regime and  
25 errors in numerical COD. To attempt a comparison, each plot data point represents the  
26 average of the 90 instantaneous COD measurements produced by TWST during that same 90  
27 second period for AERONET.

28 Of the 244 overlapping COD values, 235 (96%) showed the same cloud thickness regime.  
29 Some analysis was done in an effort to determine whether TWST or AERONET Cloud-Mode  
30 was probably correct. For the nine cases where AERONET and TWST disagreed on the  
31 thickness regime, detailed nose plots were generated to see if we could visually extract more



1 than the simple slope information used in the automated algorithm. Four of the cases  
2 produced close to the ideal nose shape, indicating that the TWST thickness regime was  
3 probably correct. For the other five cases, the nose plot was too distorted to determine the  
4 thickness regime, indicating that the TWST thickness regime was probably incorrect and  
5 should have been assigned the “unknown” label.

6 A linear fit of TWST to AERONET Cloud-Mode COD, for the 235 cases of thickness regime  
7 agreement, for fixed zero-intercept, found a slope of 0.843 (TWST reporting higher COD  
8 values) with an rms difference of COD 3.2. This was repeated while dropping the two high  
9 COD value outlier points (Figure 16), but the slope only changed by 1%. No evidence of a  
10 constant offset between TWST and AERONET Cloud-Mode was found. However, the  
11 sparsity of such evidence is due to the relatively few optically thin COD cases available from  
12 AERONET, due to the secondary mission status of its Cloud-Mode. (When skies are largely  
13 clear, AERONET executes its primary mission of aerosol optical depth and microphysical  
14 property retrieval measurements). Therefore, another linear fit, this time with free-intercept,  
15 found a slope of 0.905 and constant offset of -2.1.

16 The two primary candidates for causing the observed disagreements are differences in the  
17 TWST and AERONET Cloud-Mode lookup tables and effects from the trimmed mean  
18 process. There may also be some residual effects due to FOV and pointing differences,  
19 although these are not expected to be large due to the very good spectral radiance agreement  
20 (section 4.2.1). A partial explanation centering on the lookup tables is the difference in  
21 assumed ground albedos between the sensors. The TWST SR440-to-COD lookup table  
22 generated from MODTRAN used a weighted average of water, deciduous vegetation, dead  
23 pine, and sand albedos, resulting in an earth albedo at 440 nm of 0.078545. On the other  
24 hand, AERONET updates its ground albedo episodically every few days from MODIS data  
25 products or a (rolling) 16-day average MODIS historical database (Chiu et al, (2012)). For  
26 this dataset, the AERONET-employed albedos were lower than that assumed for TWST,  
27 varying between 0.02-0.04, 0.03 average. Most of the sample points are in the optically Thick  
28 regime, and according to our albedo sensitivity discussion (section 3.2.2), a *lower* than  
29 expected albedo implies TWST retrieval of *higher* COD values in the Thick regime,  
30 consistent with the linear fits. Figure 8 depicts an approximately constant relative COD  
31 retrieval error of about 10% per 0.1 albedo increment. The 0.05 average difference in

assumed albedo therefore explains about half (0.05) of the difference between a slope of unity and the fitted slope (0.905).

It must always be kept in mind that the COD values determined by TWST and AERONET Cloud-Mode are only equivalent 1DRT quantities. Violations of 1D assumptions are present in nearly all our measurements to some extent. This includes (1) cases where the observed spectral radiance is greater than that possible for any 1D cloud, (2) cases where deviations from the ideal nose plot are too high for any 1D cloud and (3) the many cases where the rapid variation in spectral radiance is too high for 1D clouds.

## **5 Conclusions**

Overall the good agreement between TWST and AERONET Cloud-Mode Cloud Optical Depth values, across many weeks of coincident field deployment, validates the performance of the Three Waveband Spectrally-agile Technique as well as the field-worthiness of the TWST sensor. Although the spectrally-agile nature of TWST was not investigated in this study, its advantage over fixed spectral bands for cases with high albedo at 440 nm may be the focus of a future study. Although our error sensitivity studies in section 3.2.2 and the agreement with AERONET over many weeks of the TCAP campaign lend confidence in applying TWST for nominal conditions, future efforts will ascertain and, where possible, extend the operational limits (e.g., SZA, ground albedo) of the TWST retrieval algorithm.

One of the most notable results of our experience with TWST is the high signal-to-noise ratio available in the high temporal (1 second), spatial ( $0.5^\circ$  field of view), and spectral (2.5 nm) resolution data TWST generates. At peak signal, at a COD value of approximately 5, the SNR is estimated to be 5,000:1 for 1 Hz reports.

## **Acknowledgements**

The authors thank Christine Chiu of University of Reading, UK for help in understanding the AERONET Cloud-Mode algorithm, Brent Holben and the AERONET team at NASA Goddard, Laurie Gregory and Richard Wagener of Brookhaven National Lab and Ilya Slutsker of Sigma Space Corp. for details on the particular AERONET sensor used at TCAP, as well as the TCAP PI Larry Berg of PNNL and Paul Ortega of LANL for permission to participate in TCAP, MAGIC PI Ernie Lewis of Brookhaven National Lab for the idea of a TWST deployment at TCAP, and Vaughan Ivens for invaluable assistance onsite at Cape Cod. Data were obtained from the Atmospheric Radiation Measurement (ARM) Program

Climate Research Facility sponsored by the U.S. Department of Energy, Office of Science, Office of Biological and Environmental Research, Climate and Environment Sciences Division. The Cimel Sun-photometer data were collected by the U.S. Department of Energy as part of the Atmospheric Radiation Measurement (ARM) Program Climate Research Facility and processed by the National Aeronautics and Space Administration's Aerosol Robotic Network (AERONET).

## References

Baldrige, A. M., Hook, S. J., Grove, C. I., and Rivera, G.: The ASTER Spectral Library Version 2.0., *Remote Sens. Environ.*, 113, 711-715, 2009.

Barker, H. W., and Marshak, A.: Inferring optical depth of broken clouds above green vegetation using surface solar radiometric measurements, *J. Atmos. Sci.*, 58, 2989-3006, 2001.

Berk, A., Anderson, G. P., Acharya, P. K., Bernstein, L. S., Muratov, L., Lee, J., Fox, M., Adler-Golden, S. M., Chetwynd, J. H., Hoke, M. L., Lockwood, R. B., Gardner, J. A., Cooley, T. W., Borel, C. C., Lewis, P. E., and Shettle, E. P.: MODTRAN5: 2006 update, *P. Soc. Photo-Opt. Ins.*, 6233, 62331F, 2006.

Chiu, J. C., Marshak, A., Knyazikhin, Y., Wiscombe, W., Barker, H., Barnard, J. C., and Luo, Y.: Remote sensing of cloud properties using ground-based measurements of zenith radiance, *J. Geophys. Res.* 111, D162011, doi:10.1029/2005JD006843, 2006.

Chiu, J. C., Huang, C.-H., Marshak, A., Slutsker, I., Giles, D. M., Holben, B. N., Knyazikhin, Y., and Wiscombe, W. J.: Cloud optical depth retrievals from the Aerosol Robotic Network (AERONET) cloud mode operation, *J. Geophys. Res.*, 115, D14202, doi:10.1029/2009JD013121, 2010.

Chiu, J. C., Marshak, A., Huang, C.-H., Várnai, T., Hogan, R. J., Giles, D. M., Holben, B. N., O'Connor, E. J., Knyazikhin, Y., and Wiscombe, W. J.: Cloud droplet size and liquid water path retrievals from zenith radiance measurements: Examples from the Atmospheric Radiation Measurement Program and the Aerosol Robotic Network, *Atmospheric Chemistry and Physics Discussions*, 12:8, 19163–208, doi:10.5194/acpd-12-19163-2012, 2012.

Fielding, M. D., Chiu, J. C., Hogan, R. J., and Feingold, G.: A novel ensemble method for retrieving properties of warm cloud in 3-D using ground-based scanning radar and zenith radiances, *J. Geophys. Res. Atmos.*, 119, doi:10.1002/2014JD021742, 2014.

1 Harrison, I. and Min, Q.-L.: Photon pathlength distributions in cloudy atmospheres from  
2 ground-based high-resolution O<sub>2</sub> A-band spectroscopy. IRS'96 Current Problems in  
3 Atmospheric Radiation, W. L. Smith and K. Stamnes, Eds., Deepak Publishers, 594-597,  
4 1997.

5 Kikuchi, N., Nakajima, T., Kumagai, H., Kuroiwa, H., Kamei, A., Nakamura, R., and  
6 Nakajima, T. Y.: Cloud optical thickness and effective particle radius derived from  
7 transmitted solar radiation measurements: Comparison with cloud radar observations, J.  
8 Geophys. Res., 111, D07205, 2006.

9 King, M. D.: Determination of the scaled optical thickness of clouds from reflected solar  
10 radiation measurements, J. Atmos. Sci. 44, 1734-1751, 1987.

11 Liu, J., Li, Z., Zheng, Y., Chiu, J. C., Zhao, F., Cadeddu, M., Weng, F., and Cribb, M.: Cloud  
12 optical and microphysical properties derived from ground-based and satellite sensors over a  
13 site in the Yangtze Delta region, J. Geophys. Res. Atmos., 118, 9141-9152,  
14 doi:10.1002/jgrd.50648, 2013.

15 Marshak, A., Knyazikhin, Y., Davis, A., Wiscombe, W., and Pilewskie P.: Cloud-vegetation  
16 interaction. Use of normalized difference cloud index for estimation of cloud optical  
17 thickness, Geophys. Res. Lett., 27, 1695-1698, 2000.

18 Marshak, A., Knyazikhin, Y., Evans, K. D., and Wiscombe, W. J.: The "RED versus NIR"  
19 plane to retrieve broken-cloud optical depth from ground-based measurements, J. Atmos. Sci.,  
20 61, 1911-1925, 2004.

21 McBride, P. J., Schmidt, K. S., Pilewskie, P., Kittelman, A. S., and Wolfe, D. E.: A spectral  
22 method for retrieving cloud optical thickness and effective radius from surface-based  
23 transmittance measurements, Atmos. Chem. Phys., 11, 7235-7252, doi:10.5194/acp-11-7235-  
24 2011, 2011.

25 Melnikova, I., Domnin, P., Mikhailov, V., and Radionov, V.: Optical cloud characteristics  
26 derived from measurements of reflected or transmitted solar radiation, J. Atmos. Sci. 57,  
27 2135-2143, 2000.

28 Mulliken, R. S.: Interpretation of the atmospheric oxygen bands; electronic levels of the  
29 oxygen molecule, Nature, 122, 505, 1928.

- 1 Nakajima, T., and King, M.: Determination of the optical thickness and effective particle  
2 radius of clouds from reflected solar radiation measurements. Part I: Theory, J. Atmos. Sci.  
3 47, 1878-1893, 1990.
- 4 Pfeilsticker, K., Erle, F., Funk, O., Veitel, H., and Platt, U.: First geometrical pathlengths  
5 probability density function derivation of the skylight from spectroscopically highly resolving  
6 oxygen A-band observations, J. Geophys. Res., 103:D10, 11483-11504, 1998.
- 7 Pfeilsticker, K., Erle, F., Funk, O., Veitel, H., and Platt, U.: Cloudy sky photon pathlength as  
8 derived from DOAS-observations, IRS'96 Conference, Fairbanks, AK, 19-24 August 1996,  
9 1996.
- 10 Stamnes, K., Tsay, S.-C., Wiscombe, W., and Jayaweera, K.: Numerically stable algorithm  
11 for discrete-ordinate-method radiative transfer in multiple scattering and emitting layered  
12 media, Appl. Optics, 27:12, 2502–9. doi:10.1364/AO.27.002502, 1988.
- 13 Stephens, G. L.: Radiation profiles in extended water clouds. II: Parameterization schemes, J.  
14 Atmos. Sci., 35:11, 2123–32, doi:10.1175/1520-0469(1978)035<2123:RPIEWC>2.0.CO;2,  
15 1978.
- 16 Wark, D. Q. and Mercer, D. M.: Absorption in the atmosphere by the oxygen A band, Appl.  
17 Optics, 4, 839-844, 1965.
- 18 Wood, R., and Hartmann, D. L.: Spatial variability of liquid water path in marine low cloud:  
19 The importance of mesoscale cellular convection, J. Climate, 19:9, 1748–64.  
20 doi:10.1175/JCLI3702.1, 2006.
- 21

1 Table 1 TWST Cloud Optical Depth Sensor Specifications

| <b>TWST Cloud OD Sensor Specifications</b><br><b>For Ambient Temperature Range -10°C to +40°C</b> |                                                                                          |
|---------------------------------------------------------------------------------------------------|------------------------------------------------------------------------------------------|
| Weight                                                                                            | 20 lbs                                                                                   |
| Power and Communication for Optical Head                                                          | 5 Vdc, <250 mA via a single USB 2.0 cable connection to computer for power and data      |
| Size                                                                                              | 11 x 8 x 8 in plus 12 in external sun baffle; or 13 x 10 x 6 in with internal sun baffle |
| Operating Range                                                                                   | Blue Sky to Cloud OD 100                                                                 |
| Cloud OD Sensitivity                                                                              | 0.001 for Optically Thin Clouds                                                          |
| Weatherproof Environmental Container                                                              | IP66, NEMA 4X sealed enclosure with desiccant                                            |
| Data Logging Rate                                                                                 | 1 Hz (typical), variable sampling interval from 0.1 to 60 seconds                        |
| Field of View                                                                                     | 0.5 °                                                                                    |
| Spectral Range, Resolution                                                                        | 350 – 1000 nm, ~2.5 nm                                                                   |
| Spectral Bands currently used in Cloud OD retrieval                                               | 440, 760, and 870 nm                                                                     |

2

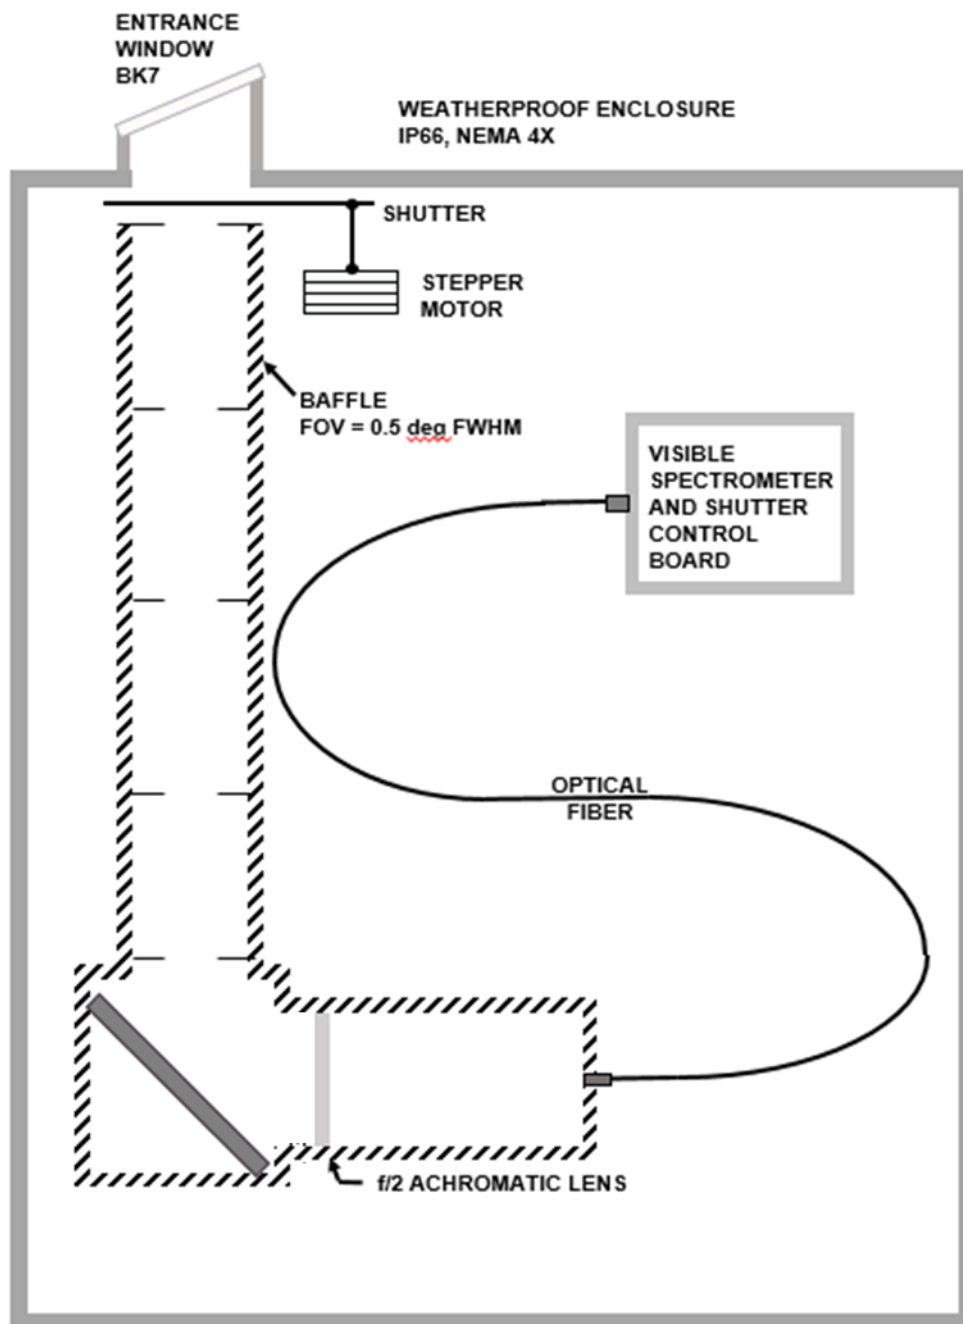

Figure 1 Simplified schematic of the TWST Cloud Optical Depth Sensor.

1

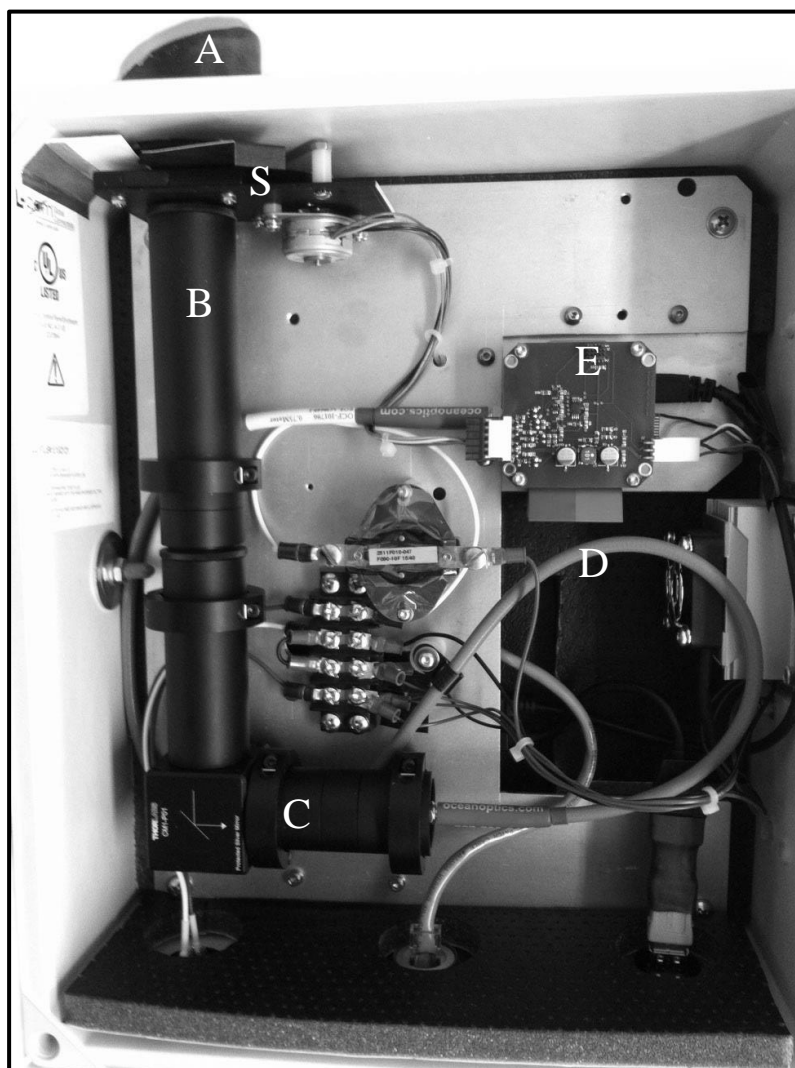

2

3

4

5

6

Figure 2 A view inside the TWST Cloud Optical Depth Sensor. See text for labeled component descriptions.



1

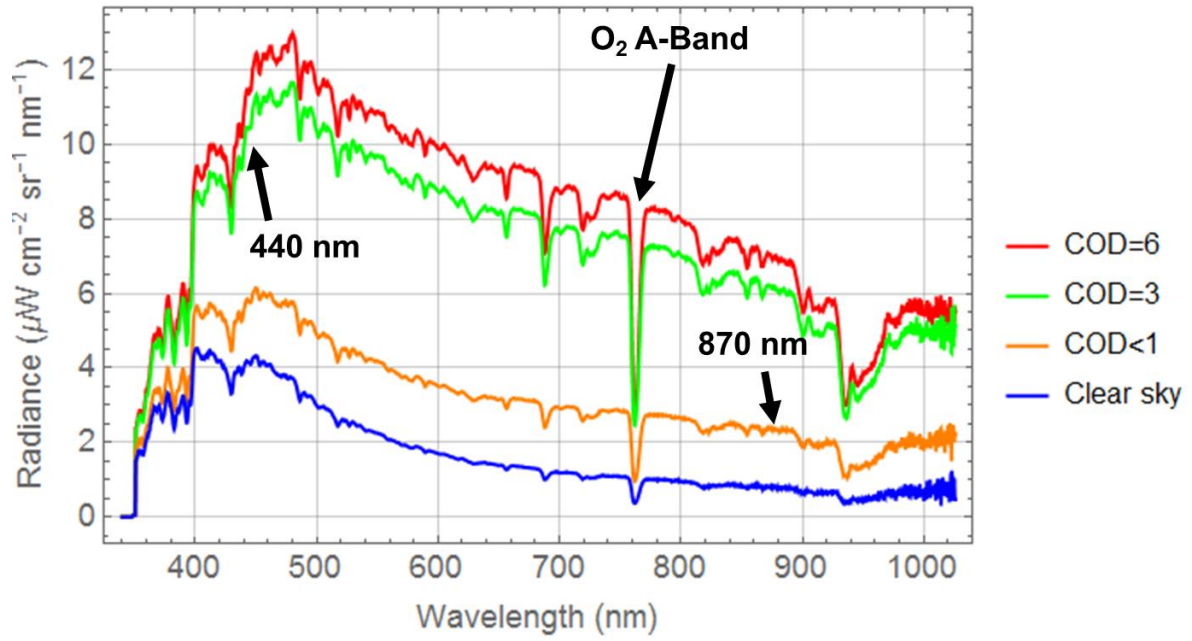

2

3 Figure 3. Example spectra measured by TWST sensor, delineating the three spectral factors  
 4 currently used in TWST retrieval algorithm. Spectra measured at SZA=65 ° within 1 minute.

5

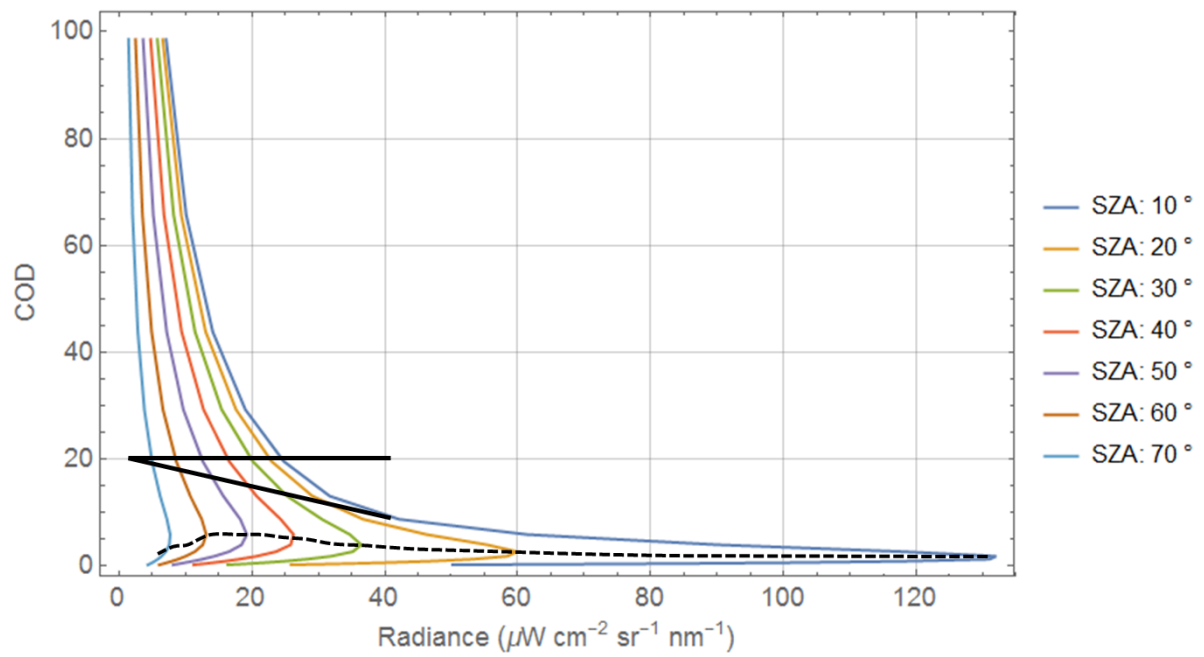

Figure 4 440 nm radiance to COD look-up tables for various SZA. The radiance peak for each curve is its 1DRT “bright point” radiance. The black solid and dotted line markers are referred to in various sections of the text.

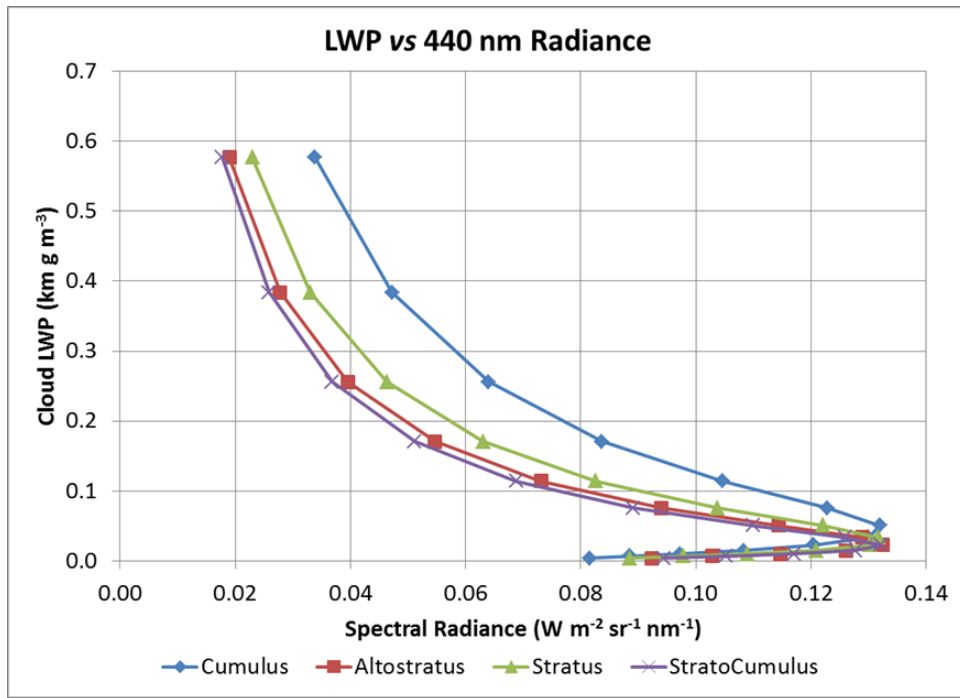

(a) Cloud LWP vs radiance

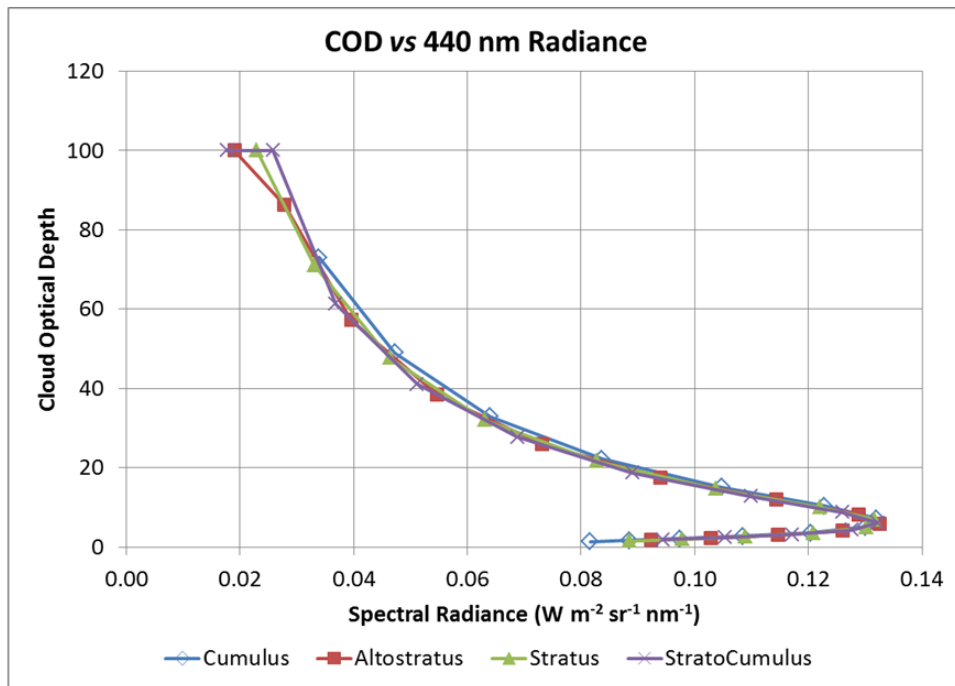

(b) Cloud OD vs radiance

1

2 Figure 5. Relationship between spectral radiance at 440 nm wavelength and (a) liquid water  
 3 path (LWP) and (b) cloud optical depth, for four different cloud types: effective radii of 12.0,  
 4 (cumulus), 7.2 (altostratus), 8.3 (stratus), and 6.7 (stratocumulus)  $\mu\text{m}$ .

5

1

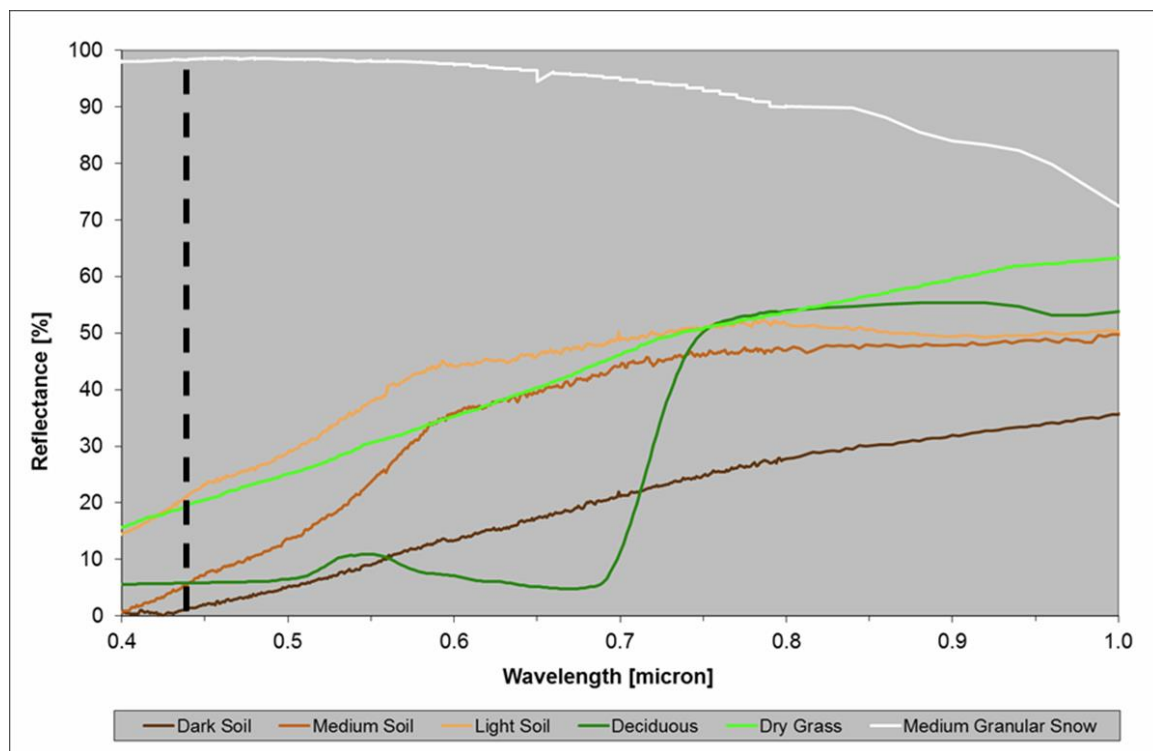

2

3 Figure 6. Spectral albedos of common Earth cover types from the ASTER Database; the  
 4 vertical dashed line indicates the 440 nm wavelength.

5

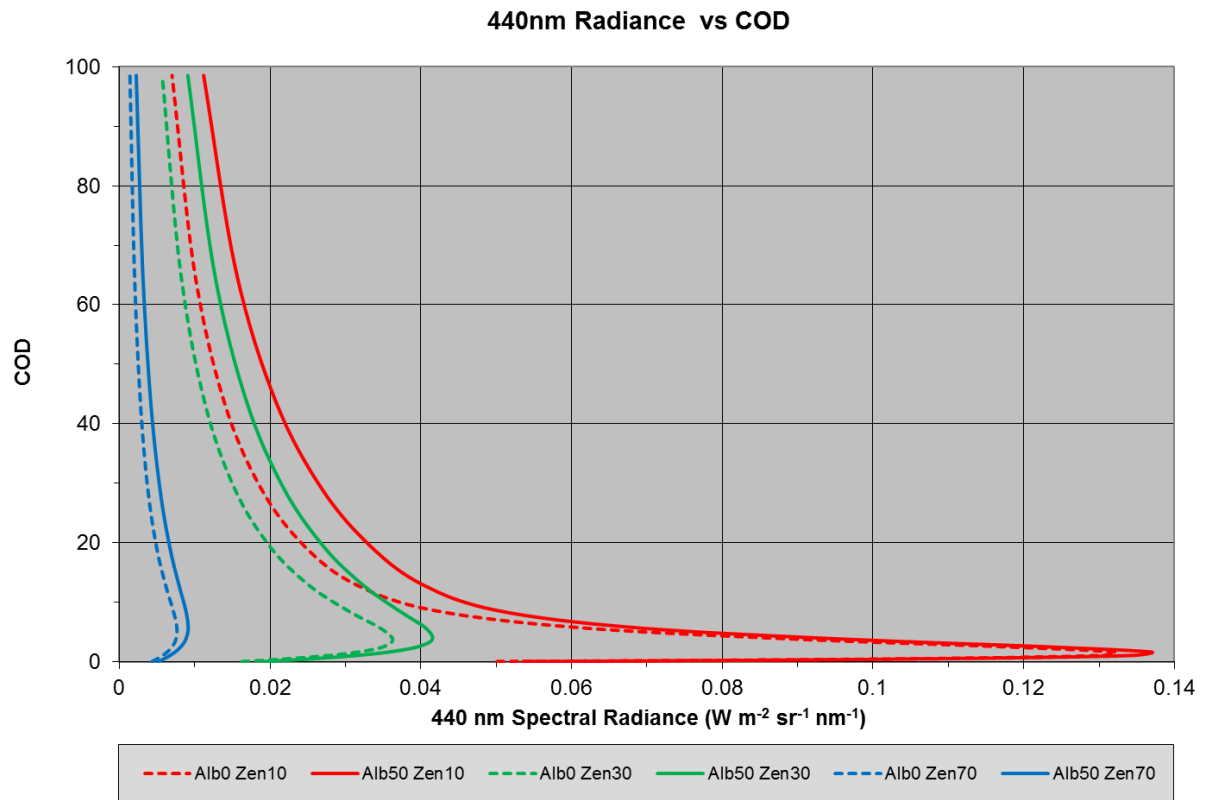

Figure 7. Cloud OD vs 440 nm spectral radiance for solar zenith angles of 10 °, 30 ° and 70 ° and for ground albedos of 0 and 50%.

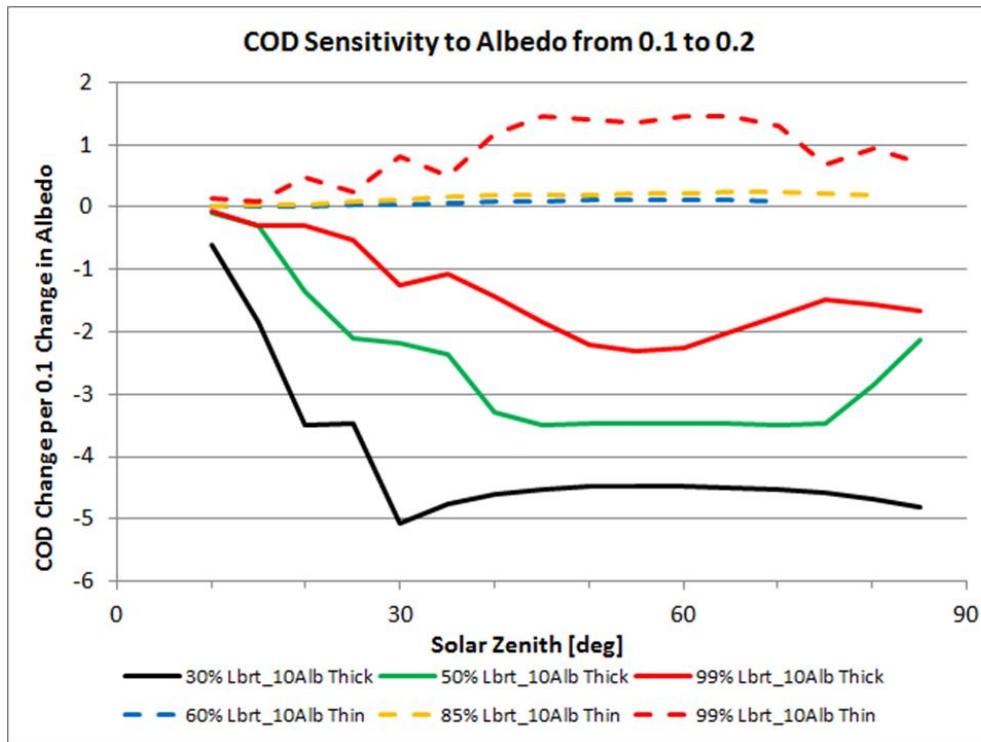

(a) Retrieved COD sensitivity: MODTRAN

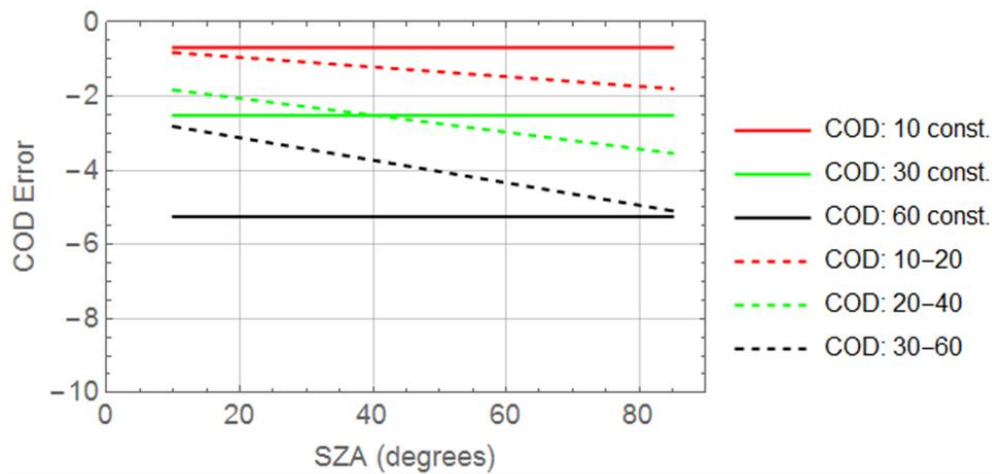

(b) Retrieved COD sensitivity: Asymptotic RT

1

2 Figure 8. Retrieved COD sensitivity to change in albedo from 0.1 to 0.2 (a) for different  
 3 relative cloud radiance levels as computed using MODTRAN, and (b) as computed using  
 4 asymptotic RT relations. See text for details.

5

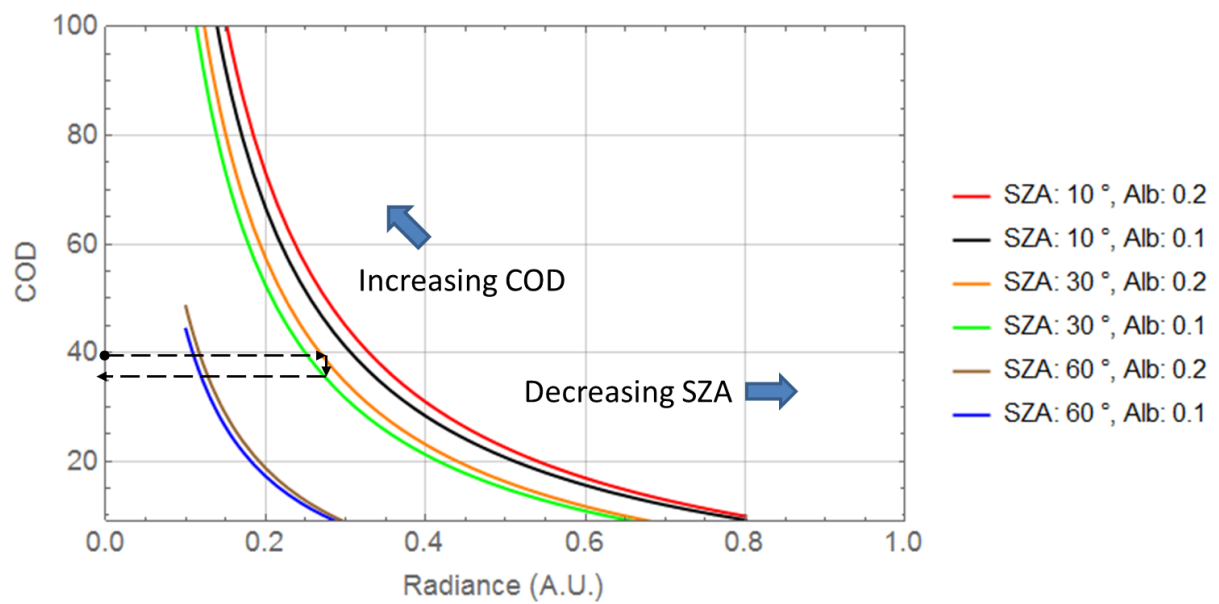

Figure 9 Retrieved COD sensitivity to change in ground albedo from 0.1 (left curves) to 0.2 (right curves) for 3 different SZA curve pairs, computed using asymptotic RT relations. See text for details.

1

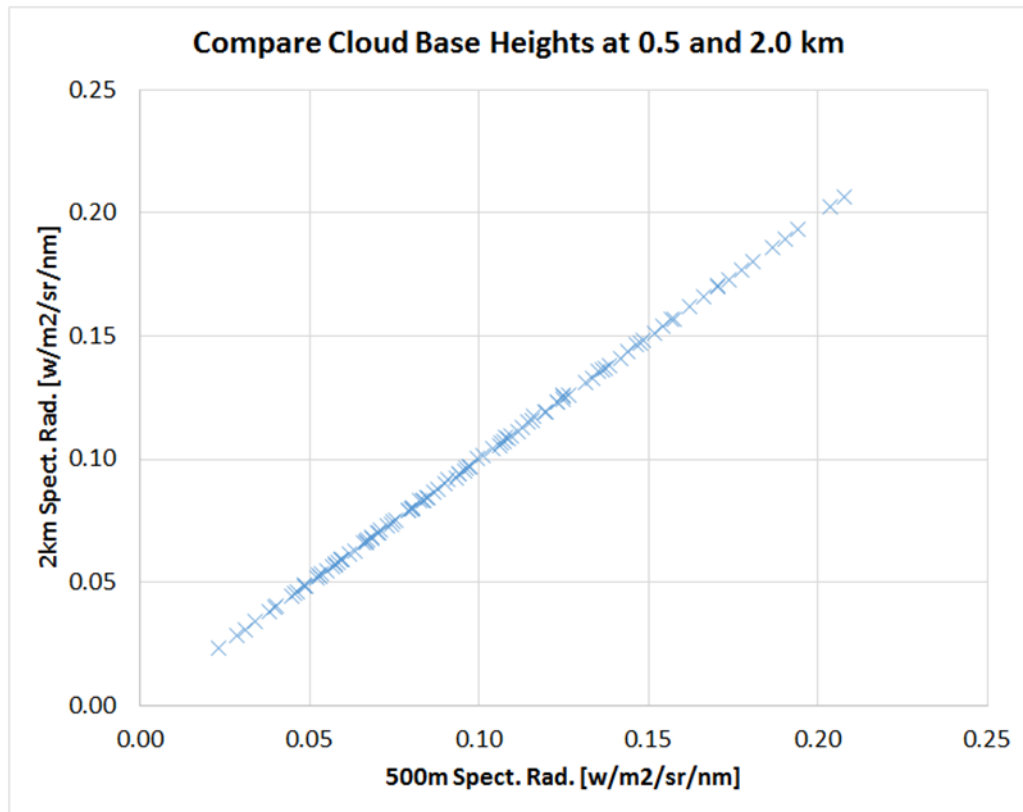

2

3 Figure 10. Scatter plot comparing 440 nm radiance computed for cloud base heights of 500 m  
4 and 2 km, each varying over 10 COD and 11 solar zenith angles.

5



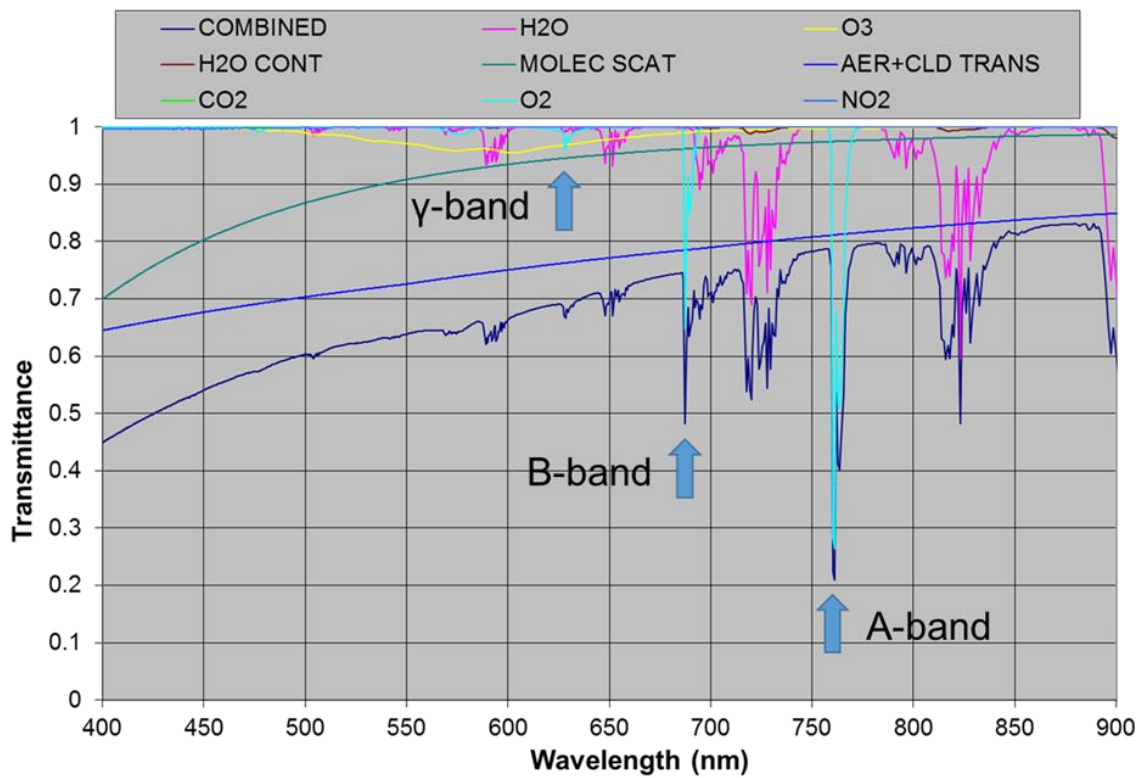

Figure 11 MODTRAN5 calculation of atmospheric transmittance for a ground-based zenith path to space. The Oxygen A-Band is virtually free of absorption by any other species except for aerosol and cloud continua extinction. At  $0.1 \text{ cm}^{-1}$  spectral resolution, H<sub>2</sub>O (water vapor) has a minimum transmittance of 0.9972 across the A-band.

1

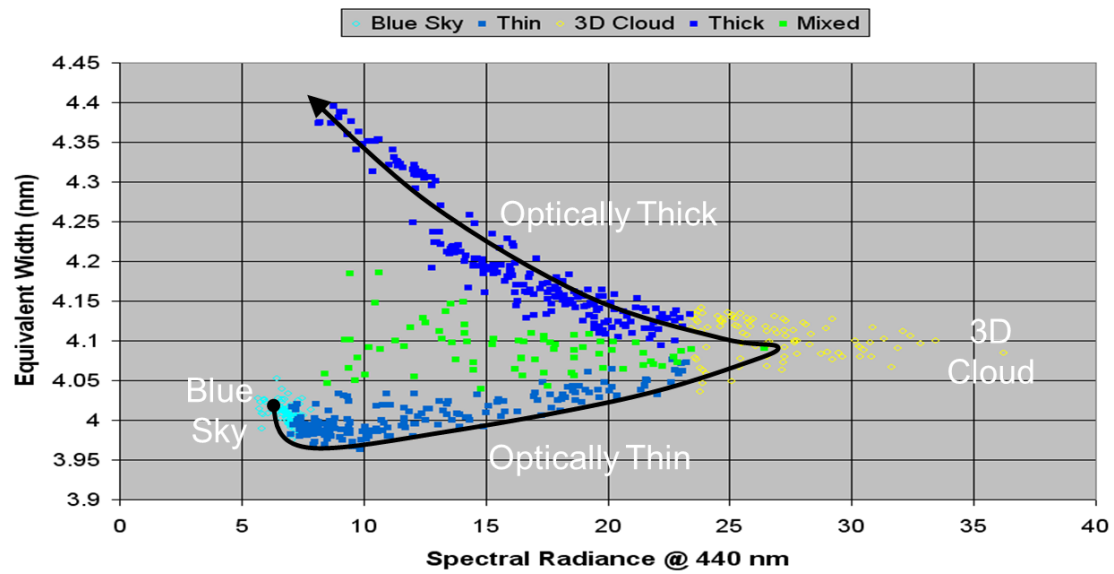

2

3 Figure 12. The “nose” plot of SR440 vs EQW, indicating a trajectory with increasing COD.  
 4 The data sample categories (colors) are described in the text.

5

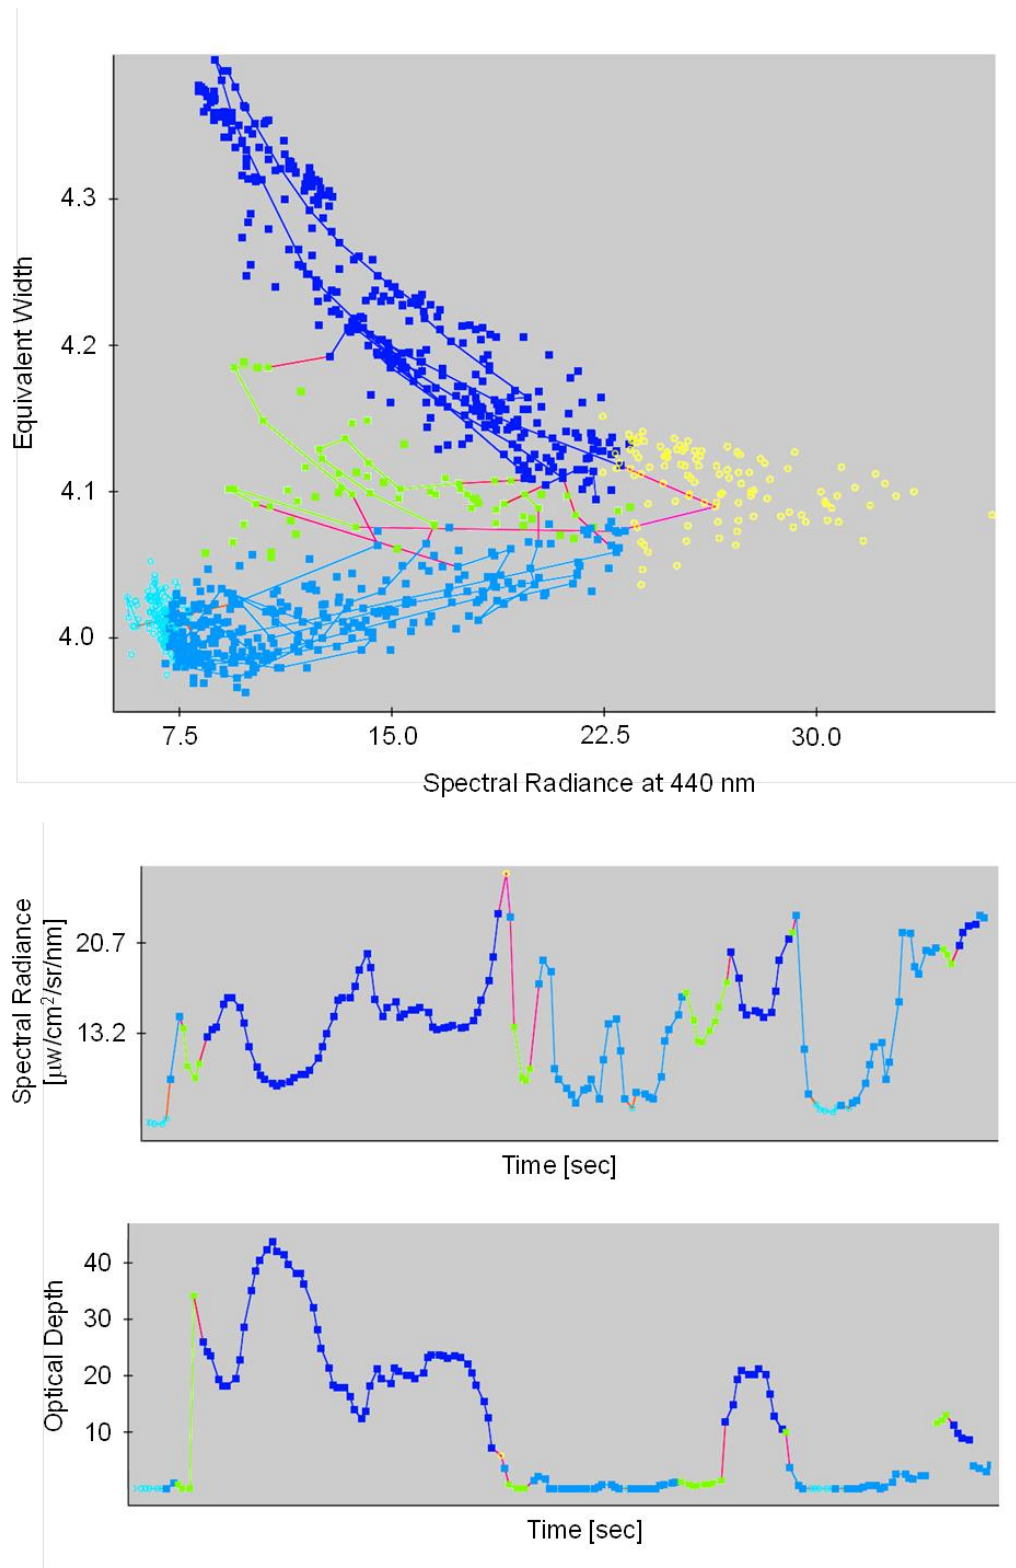

Figure 13. (TOP) Nose plot of data taken over several minutes. The colors are described in the text. (MIDDLE, BOTTOM) Simultaneous time plots of spectral radiance and retrieved optical depth corresponding to the TOP nose plot.

1

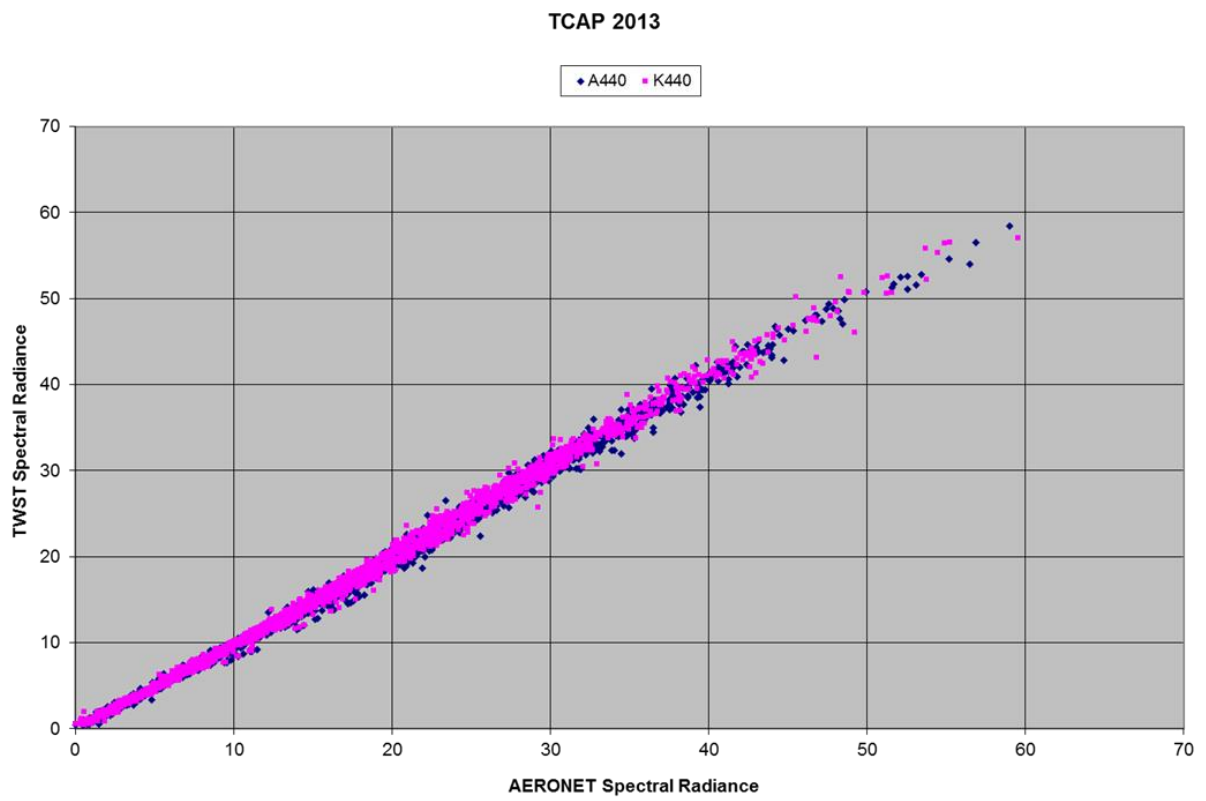

2

3 Figure 14. Comparison of TWST and AERONET Cloud-Mode spectral radiances ( $\mu\text{W cm}^{-2}$   
4  $\text{sr}^{-1} \text{nm}^{-1}$ ) at 440 nm wavelength.

5

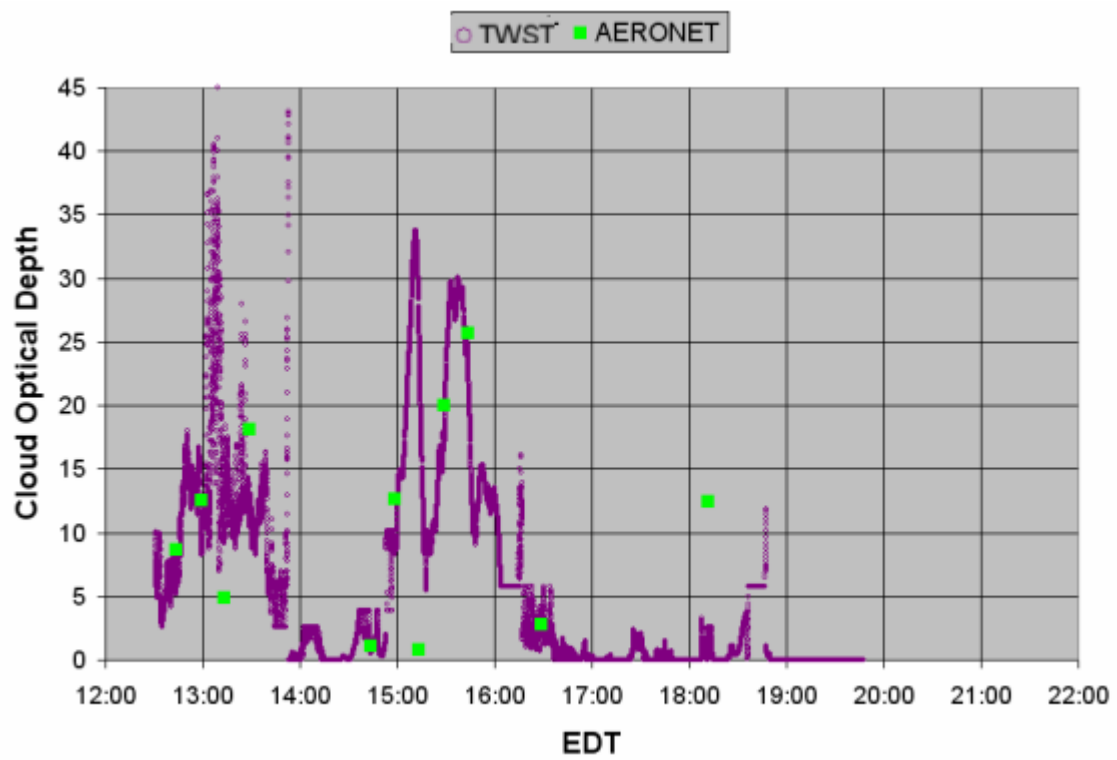

Figure 15 COD time series comparison between AERONET and TWST for 14 June 2013 at the ARM TCAP field campaign.

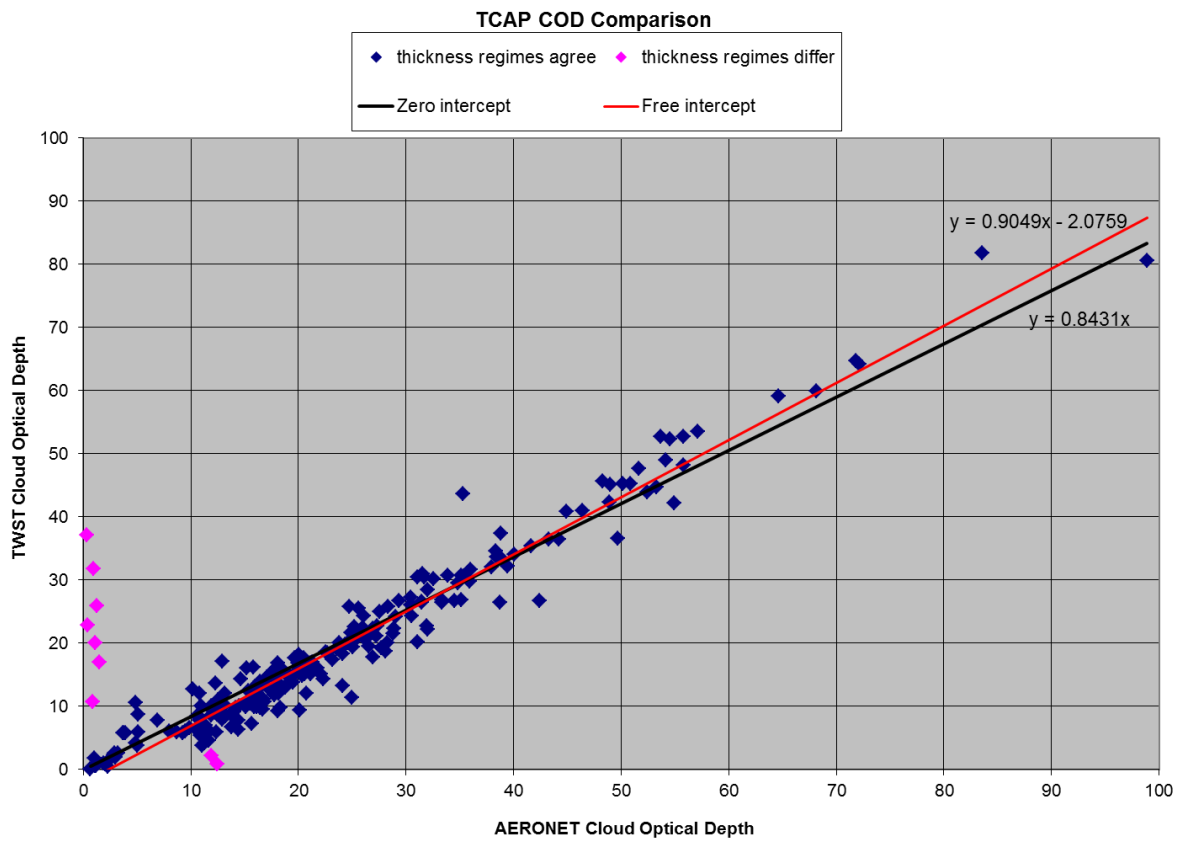

1  
2 Figure 16 Comparison of TWST and AERONET Cloud-Mode Cloud Optical Depths.
